# Supplementary material for: Where Do Adolescents Eat Less-Healthy Foods? Correspondence Analysis and Logistic Regression Results from the UK National Diet and Nutrition Survey
Source: PubMed Central journal article supplement (PMC7468703; doi:10.3390/nu12082235), 2020-07-27

**SUPPLEMENTARY MATERIAL**

|                           |                                                                   | N    | %    | % (weighted sample) |
|---------------------------|-------------------------------------------------------------------|------|------|---------------------|
| Age (years)               | 11-15                                                             | 650  | 59.6 | 61.2                |
|                           | 16-18                                                             | 440  | 40.4 | 38.8                |
| Sex                       | Male                                                              | 538  | 49.4 | 51.4                |
|                           | Female                                                            | 552  | 50.6 | 48.6                |
| Ethnicity(%)              | White                                                             | 939  | 86.1 | 80.1                |
|                           | Non-white                                                         | 149  | 13.7 | 19.7                |
| Occupational group (SES)* | 1. Higher managerial, administrative and professional occupations | 174  | 16.0 | 16.7                |
|                           | 2. Lower managerial, administrative and professional occupations  | 261  | 23.9 | 22.9                |
|                           | 3. Intermediate occupations                                       | 113  | 10.4 | 9.9                 |
|                           | 4. Small employers and own account workers                        | 150  | 13.8 | 15.0                |
|                           | 5. Lower supervisory and technical occupations                    | 89   | 8.2  | 8.0                 |
|                           | 6. Semi-routine occupations                                       | 142  | 13.0 | 12.1                |
|                           | 7. Routine occupations                                            | 114  | 10.5 | 10.0                |
|                           | 8. Never worked and long-term unemployed                          | 32   | 2.9  | 3.9                 |
|                           | Missing                                                           | 15   | 1.4  | 1.6                 |
| BMI (%)                   | Normal-weight                                                     | 687  | 63.0 | 64.2                |
|                           | Over-weight                                                       | 130  | 11.9 | 11.2                |
|                           | Obese                                                             | 234  | 21.5 | 20.6                |
|                           | Missing                                                           | 39   | 3.6  | 3.9                 |
| Drinking (%)              | Yes **                                                            | 114  | 10.5 | 9.4                 |
|                           | No (Once or twice a months or less)                               | 976  | 89.5 | 90.6                |
| Smoking (%)               | Yes ***                                                           | 72   | 6.6  | 6.2                 |
|                           | No                                                                | 1018 | 93.4 | 93.8                |

**Table ST1:** Participant characteristics 2013-2016. Data are from the National Diet and Nutrition Survey Rolling Programme Years 5-8 (2013-2016) for all respondents aged 11 to 18 years.

| (A)2008-12 Sample                          | Sweetened Soft Drinks |                                | Chips |                                | Chocolate |                                | Meat Pies |                                    |
|--------------------------------------------|-----------------------|--------------------------------|-------|--------------------------------|-----------|--------------------------------|-----------|------------------------------------|
| Confounder (after adjustment by locations) | OR                    | 99% CI<br>p-value              | OR    | 99% CI<br>p-value              | OR        | 99% CI<br>p-value              | OR        | 99% CI<br>p-value                  |
| Sex (Female)                               | 0.84                  | (0.66, 1.06)<br>p=0.05         | 1.05  | (0.83, 1.32)<br>p=0.61         | 1.12      | (0.83, 1.51)<br>p=0.32         | 1.06      | (0.61, 1.86)<br>p=0.78             |
| Age                                        | 1.04                  | (0.98, 1.11)<br>p=0.09         | 0.99  | (0.94, 1.06)<br>p=0.82         | 0.96      | (0.89, 1.04)<br>p=0.19         | 1.13      | (0.96, 1.33)<br><b>p&lt;0.0001</b> |
| SES (1)                                    | 0.98                  | (0.64, 1.51)<br>p=0.90         | 0.63  | (0.43, 0.93)<br><b>p=0.002</b> | 0.87      | (0.89, 1.04)<br>p=0.19         | 1.87      | (0.75, 4.65)<br>p=0.08             |
| SES (3)                                    | 1.67                  | (1.06, 2.64)<br><b>p=0.004</b> | 0.92  | (0.60, 1.41)<br>p=0.61         | 0.52      | (0.26, 1.04)<br>p=0.02         | 1.76      | (0.59, 5.29)<br>p=0.21             |
| SES (4)                                    | 1.04                  | (0.64, 1.72)<br>p=0.82         | 1.07  | (0.72, 1.59)<br>p=0.68         | 0.88      | (0.55, 1.42)<br>p=0.50         | 2.22      | (0.84, 5.87)<br>p=0.04             |
| SES (5)                                    | 1.48                  | (1.01, 2.19)<br><b>p=0.009</b> | 0.89  | (0.54, 1.47)<br>p=0.59         | 1.10      | (0.63, 1.93)<br>p=0.65         | 1.96      | (0.58, 6.64)<br>p=0.16             |
| SES (6)                                    | 1.33                  | (0.92, 1.92)<br>p=0.05         | 1.14  | (0.77, 1.67)<br>p=0.39         | 0.83      | (0.51, 1.34)<br>p=0.31         | 1.78      | (0.76, 4.15)<br>p=0.08             |
| SES (7)                                    | 1.27                  | (0.83, 1.94)<br>p=0.14         | 1.26  | (0.87, 1.84)<br>p=0.11         | 0.99      | (0.60, 1.64)<br>P=0.95         | 2.22      | (0.86, 5.69)<br>p=0.03             |
| SES (8)                                    | 1.58                  | (0.93, 2.68)<br>p=0.03         | 0.93  | (0.41, 2.12)<br>p=0.82         | 0.69      | (0.26, 1.81)<br>P=0.32         | 0.60      | (0.04, 9.39)<br>p=0.64             |
| Smoker                                     | 0.91                  | (0.60, 1.38)<br>p=0.56         | 1.17  | (0.70, 1.94)<br>p=0.43         | 1.03      | (0.51, 2.09)<br>P=0.92         | 1.52      | (0.54, 4.25)<br>p=0.29             |
| Drinker                                    | 1.11                  | (0.76, 1.60)<br>p=0.48         | 0.78  | (0.51, 1.18)<br>p=0.12         | 0.99      | (0.59, 1.67)<br>P=0.96         | 0.92      | (0.39, 2.17)<br>p=0.80             |
| Non-White                                  | 0.99                  | (0.72, 1.38)<br>p=0.99         | 0.88  | (0.60, 1.29)<br>p=0.39         | 0.51      | (0.30, 0.89)<br><b>P=0.002</b> | 0.71      | (0.27, 1.84)<br>p=0.35             |
| BMI                                        | 1.00                  | (0.97, 1.03)<br>p=0.80         | 1.02  | (0.99, 1.04)<br>p=0.12         | 0.97      | (0.93, 1.01)<br>P=0.03         | 0.99      | (0.93, 1.07)<br>p=0.82             |
| Weekend                                    | 1.09                  | (0.89, 1.32)<br>p=0.28         | 1.03  | (0.81, 1.31)<br>p=0.72         | 0.88      | (0.67, 1.15)<br>P=0.22         | 0.83      | (0.44, 1.57)<br>p=0.45             |
| Non-White&Smoker                           | 0.34                  | (0.14, 0.80)<br><b>p=0.001</b> | -     | -                              | -         | -                              | -         | -                                  |

| (B) 2013-16 Sample                         | Sweetened Soft Drinks |                         | Chips |                                | Chocolate |                        | Meat Pies |                        |
|--------------------------------------------|-----------------------|-------------------------|-------|--------------------------------|-----------|------------------------|-----------|------------------------|
| Confounder (after adjustment by locations) | OR                    | 99% CI<br>p-value       | OR    | 99% CI<br>p-value              | OR        | 99% CI<br>p-value      | OR        | 99% CI<br>p-value      |
| Sex (Female)                               | 1.04                  | (0.82, 1.33)<br>p=0.65  | 0.92  | (0.76, 1.11)<br>p=0.26         | 1.01      | (0.80, 1.29)<br>p=0.87 | 0.71      | (0.47, 1.09)<br>p=0.04 |
| Age                                        | 1.04                  | (0.98, 1.10)<br>p=0.11  | 1.02  | (0.97, 1.07)<br>p=0.31         | 0.95      | (0.90, 1.01)<br>p=0.02 | 1.07      | (0.97, 1.19)<br>p=0.07 |
| SES (1)                                    | 0.68                  | (0.47, 0.99)<br>p=0.007 | 0.73  | (0.53, 1.01)<br>p=0.01         | 1.14      | (0.77, 1.70)<br>p=0.39 | 0.86      | (0.41, 1.79)<br>p=0.59 |
| SES (3)                                    | 1.17                  | (0.81, 1.70)<br>p=0.27  | 1.09  | (0.78, 1.51)<br>p=0.52         | 1.13      | (0.73, 1.75)<br>p=0.49 | 1.37      | (0.66, 2.87)<br>p=0.27 |
| SES (4)                                    | 1.16                  | (0.75, 1.79)<br>p=0.38  | 1.09  | (0.79, 1.50)<br>p=0.51         | 1.23      | (0.84, 1.80)<br>p=0.16 | 1.64      | (0.83, 3.25)<br>p=0.06 |
| SES (5)                                    | 1.22                  | (0.77, 1.92)<br>p=0.27  | 1.41  | (1.03, 1.93)<br><b>p=0.005</b> | 1.16      | (0.73, 1.84)<br>p=0.40 | 1.72      | (0.82, 3.59)<br>p=0.06 |
| SES (6)                                    | 1.02                  | (0.67, 1.57)<br>p=0.89  | 1.19  | (0.86, 1.66)<br>p=0.17         | 0.90      | (0.60, 1.32)<br>p=0.47 | 1.32      | (0.66, 2.65)<br>p=0.31 |
| SES (7)                                    | 1.25                  | (0.81, 1.91)<br>p=0.19  | 1.11  | (0.82, 1.50)<br>p=0.37         | 1.05      | (0.70, 1.59)<br>p=0.74 | 1.65      | (0.74, 3.69)<br>p=0.11 |
| SES (8)                                    | 0.97                  | (0.48, 1.97)<br>p=0.92  | 1.76  | (1.22, 2.53)<br>p<0.0001       | 1.24      | (0.62, 2.48)<br>p=0.43 | 0.64      | (0.11, 3.68)<br>p=0.51 |
| Smoker                                     | 1.36                  | (0.79, 2.33)            | 1.49  | (1.07, 2.07)                   | 1.10      | (0.67, 1.81)           | 0.89      | (0.39, 2.05)           |

|                                               |      |              |      |                |      |                |      |                 |
|-----------------------------------------------|------|--------------|------|----------------|------|----------------|------|-----------------|
|                                               |      | p=0.15       |      | <b>p=0.002</b> |      | p=0.62         |      | p=0.73          |
| <b>Drinker</b>                                | 1.01 | (0.66, 1.56) | 1.05 | (0.77, 1.43)   | 1.03 | (0.70, 1.50)   | 1.02 | (0.52, 2.01)    |
|                                               |      | p=0.94       |      | p=0.70         |      | p=0.86         |      | p=0.93          |
| <b>Non-White</b>                              | 0.99 | (0.73, 1.33) | 0.95 | (0.70, 1.27)   | 0.64 | (0.45, 0.92)   | 0.29 | (0.12, 0.71)    |
|                                               |      | p=0.91       |      | p=0.63         |      | <b>P=0.001</b> |      | <b>p=0.0004</b> |
| <b>BMI</b>                                    | 0.99 | (0.96, 1.02) | 0.99 | (0.97, 1.01)   | 0.99 | (0.79, 1.37)   | 0.98 | (0.93, 1.03)    |
|                                               |      | p=0.41       |      | p=0.17         |      | P=0.31         |      | p=0.25          |
| <b>Weekend</b>                                | 1.13 | (0.96, 1.33) | 1.17 | (1.00, 1.38)   | 1.04 | (0.79, 1.37)   | 1.05 | (0.70, 1.57)    |
|                                               |      | p=0.05       |      | p=0.01         |      | P=0.71         |      | p=0.77          |
| <b>Non-White&amp;Smoker<br/>(interaction)</b> | 2.39 | (0.74, 7.69) | -    | -              | -    | -              | -    | -               |
|                                               |      | p=0.06       |      |                |      |                |      |                 |

**Table ST2:** Estimated odds ratios (with 99% CI and p-values) for all potential confounders in the adjusted logistic regression of locations (exposure) on 4 food outcomes in Table 4 (for the 2008-12 survey sample) and Table 5 (2013-16 survey sample).

Reference categories: male; SES=2; non-smoker; non-drinker; white; weekday.

For the sweetened soft drink outcome, interaction between ethnicity and smoking was also estimated as it appeared significant.

Figure S1: Correspondence analysis plot for Healthier Foods, without NDNS weights.

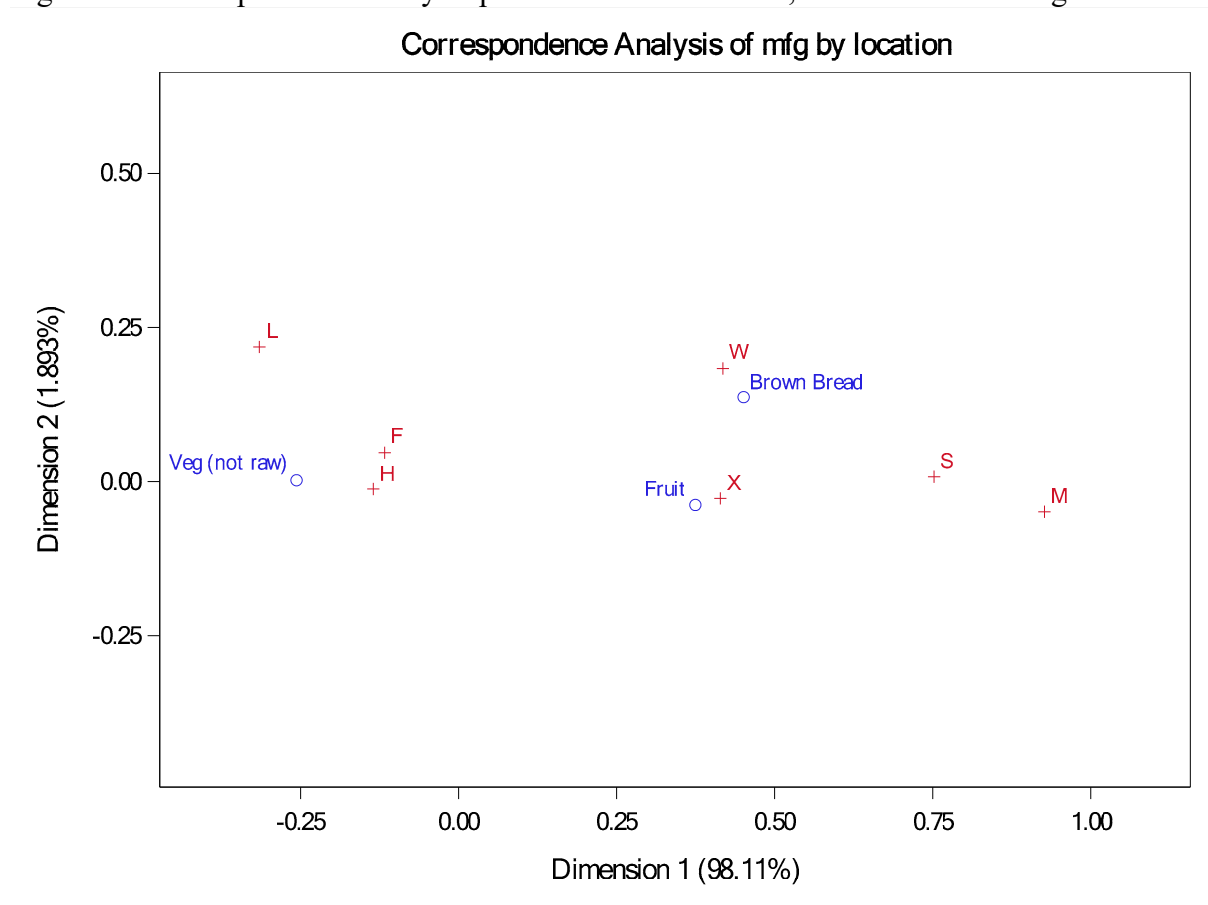

Figure S2: Correspondence analysis plot for Healthier Foods, with individual NDNS weights.

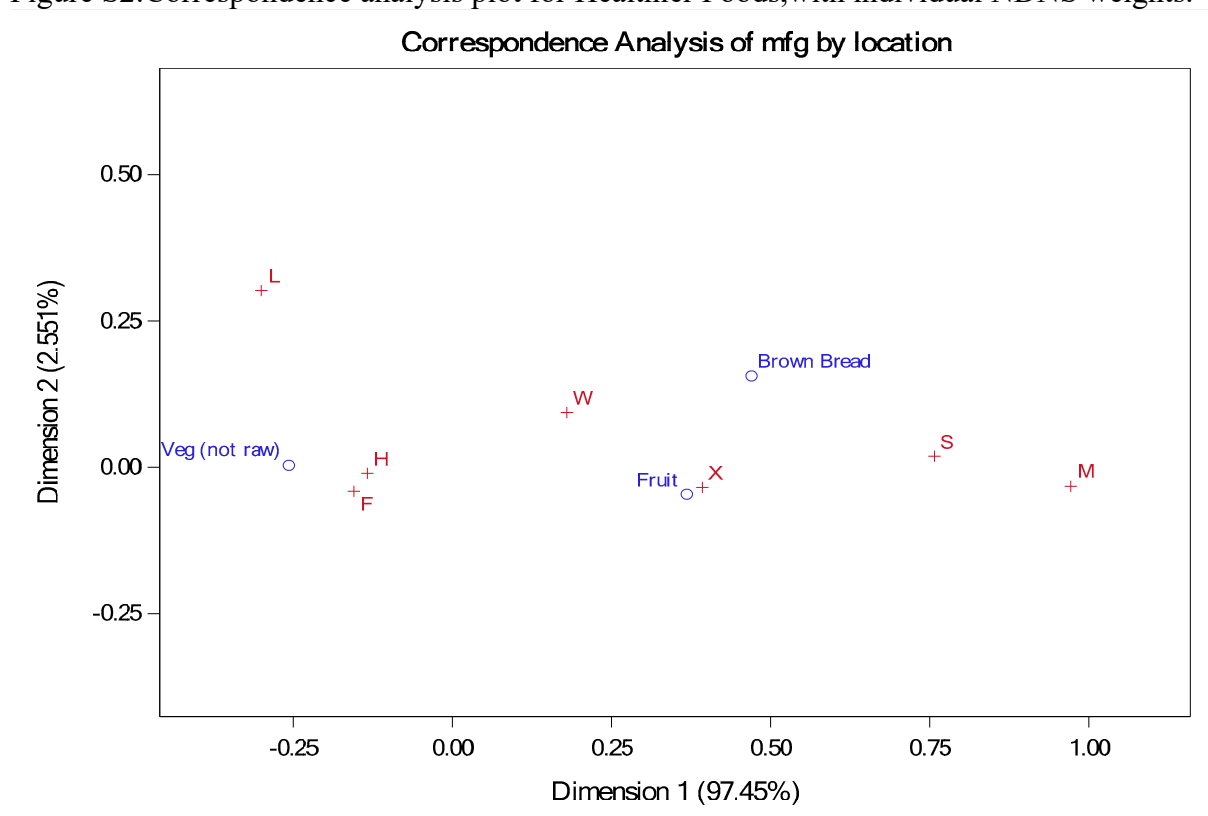

Figure S3: Correspondence analysis plot for Healthier Foods, with adjusted NDNS weights (individual's weight divided by number of food entry for that individual)

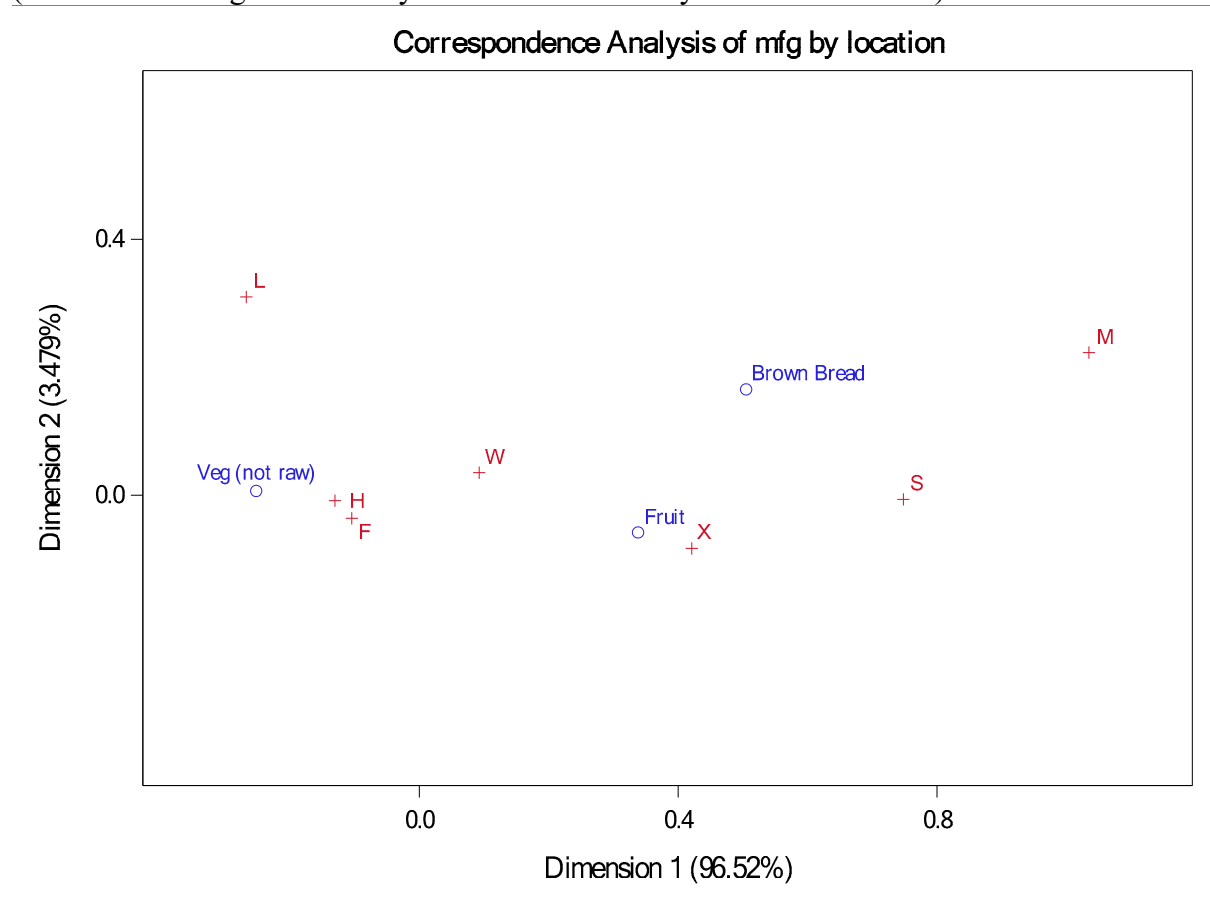

Figure S4: Correspondence analysis plot for Neutral Foods, without NDNS weights.

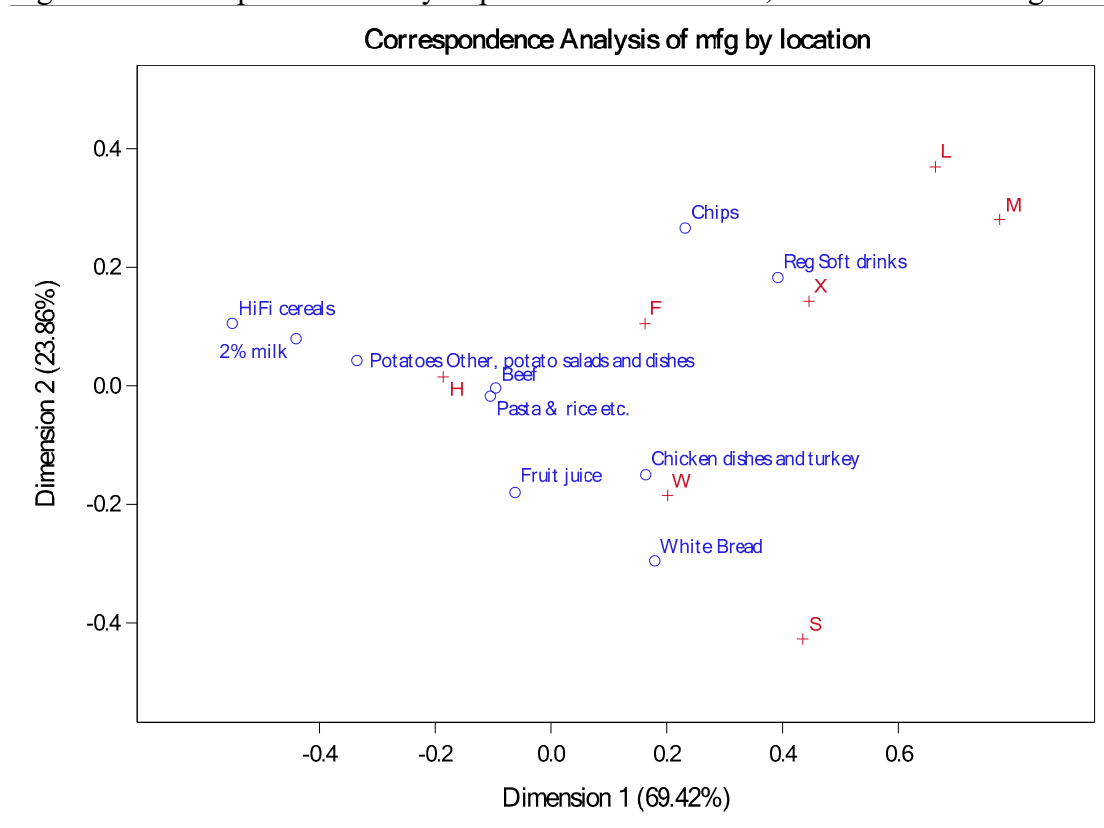

Figure S5: Correspondence analysis plot for Neutral Foods, with individual NDNS weights.

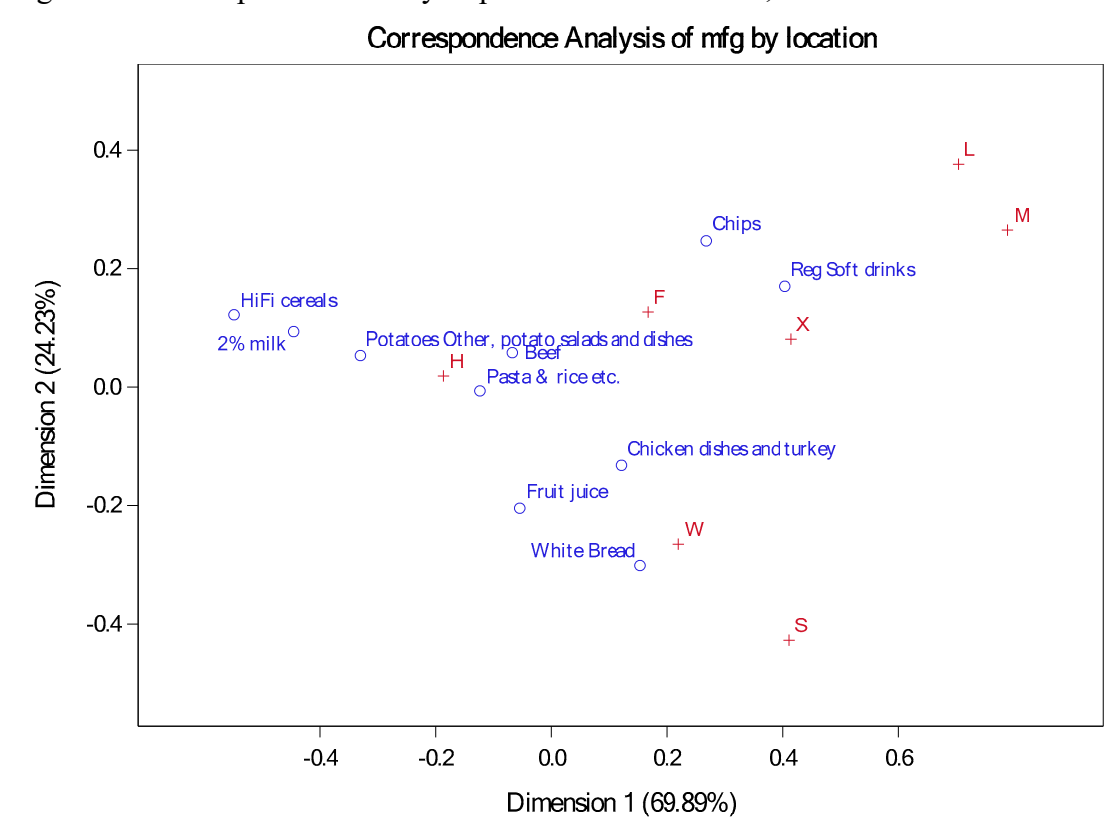

Figure S6: Correspondence analysis plot for Neutral Foods, with adjusted NDNS weights (individual's weight divided by number of food entry for that individual)

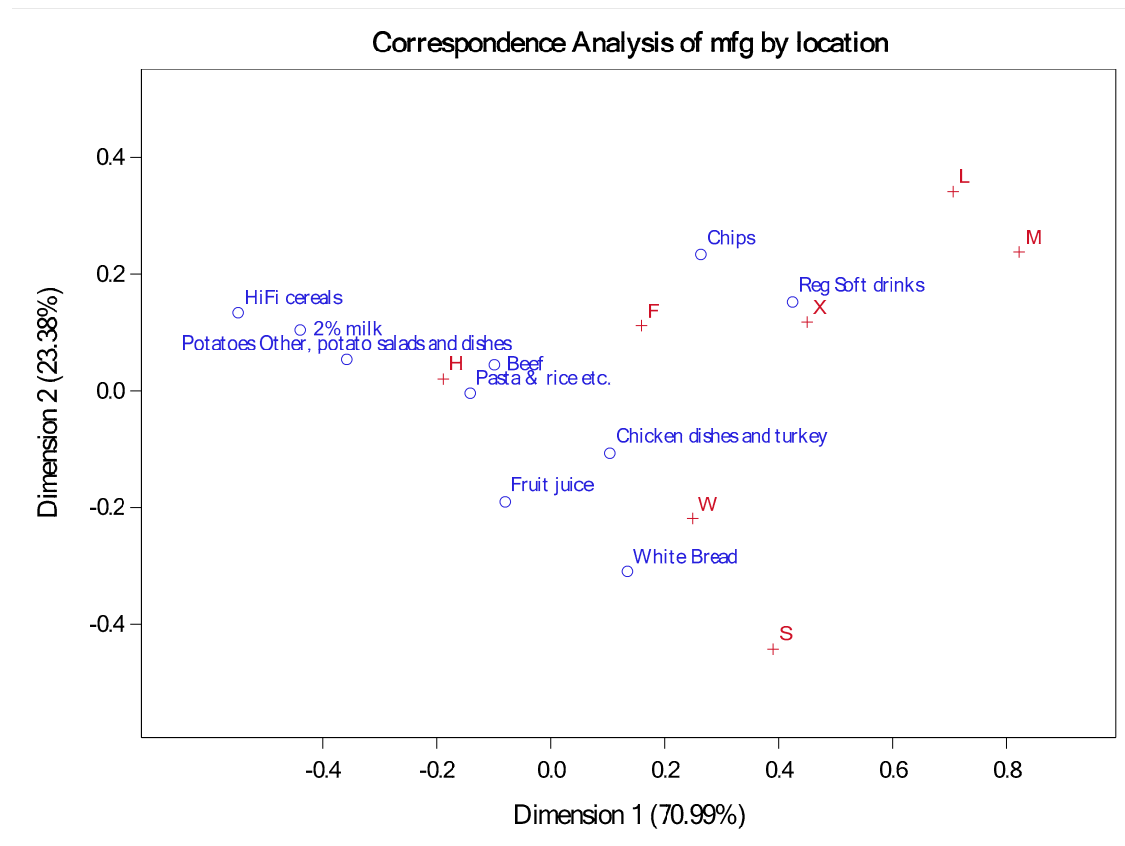

Figure S7: Correspondence analysis plot for Less-Healthy Foods, without NDNS weights.

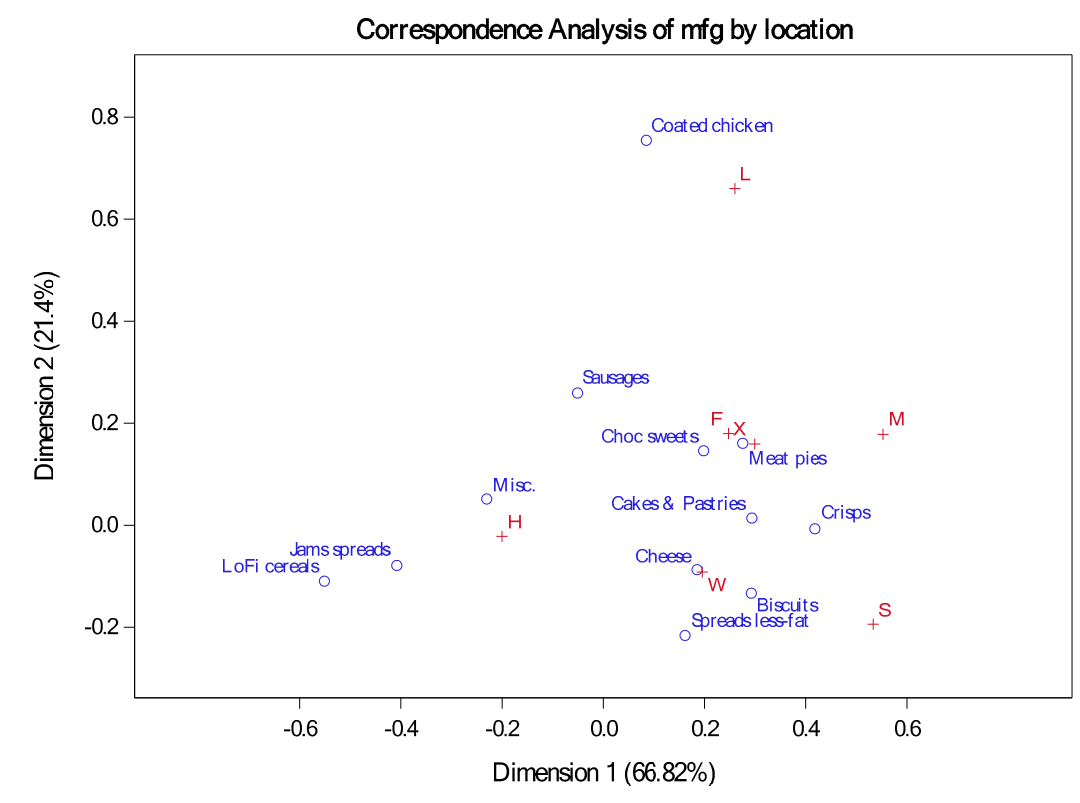

Figure S8: Correspondence analysis plot for Less-Healthy Foods, with individual NDNS weights.

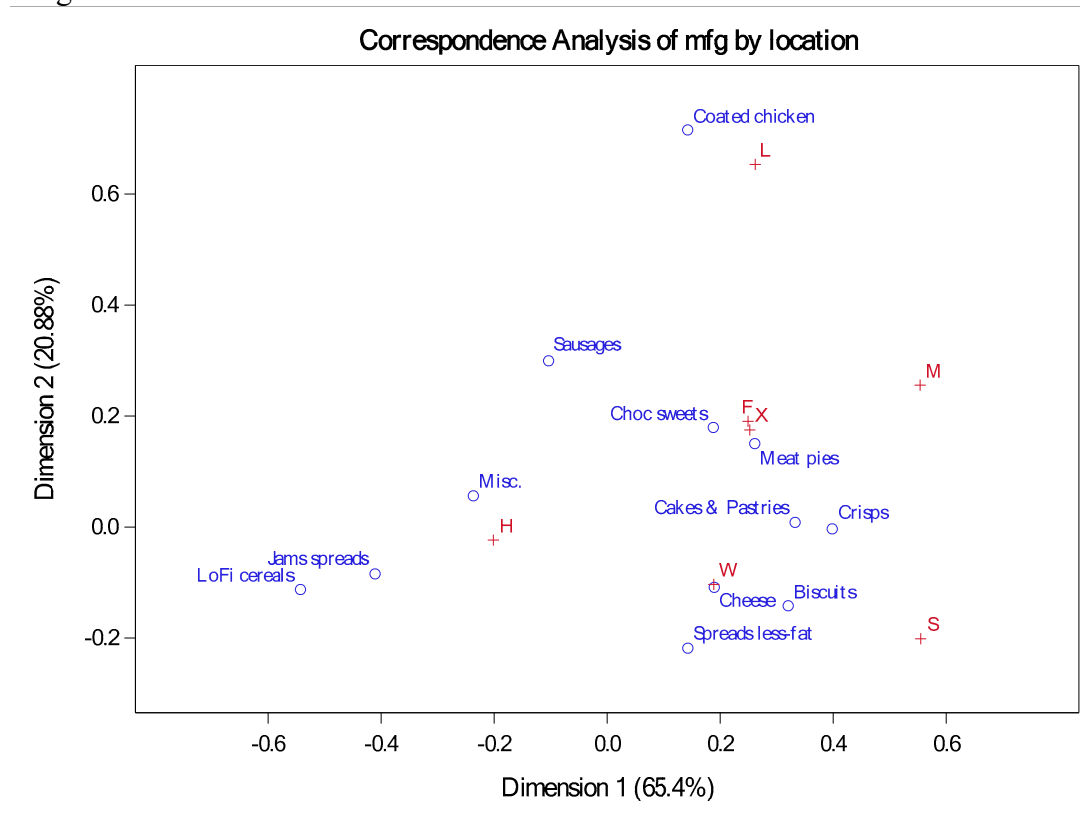



Figure S9: Correspondence analysis plot for Less-Healthy Foods, with adjusted NDNS weights (individual's weight divided by number of food entry for that individual)

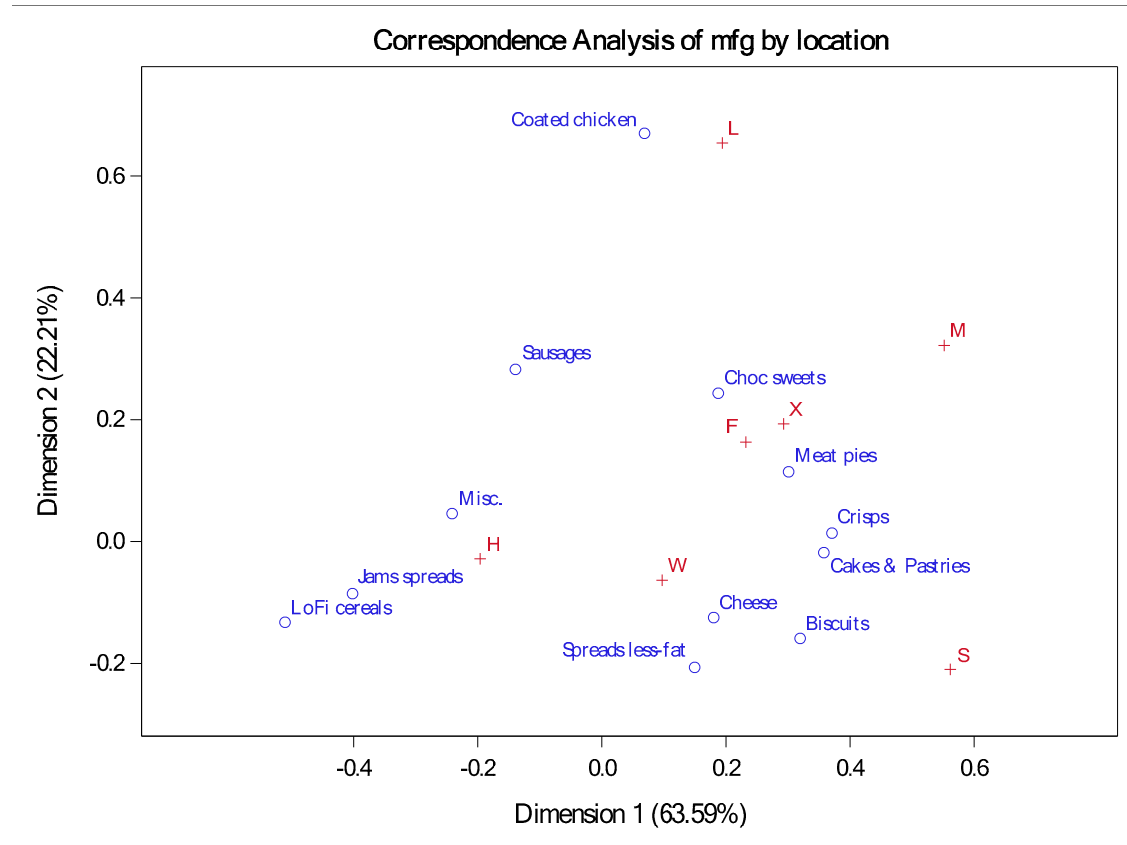

Figure S10: Correspondence analysis including all 25 main (P80) food groups for the 2008-2012 survey sample.

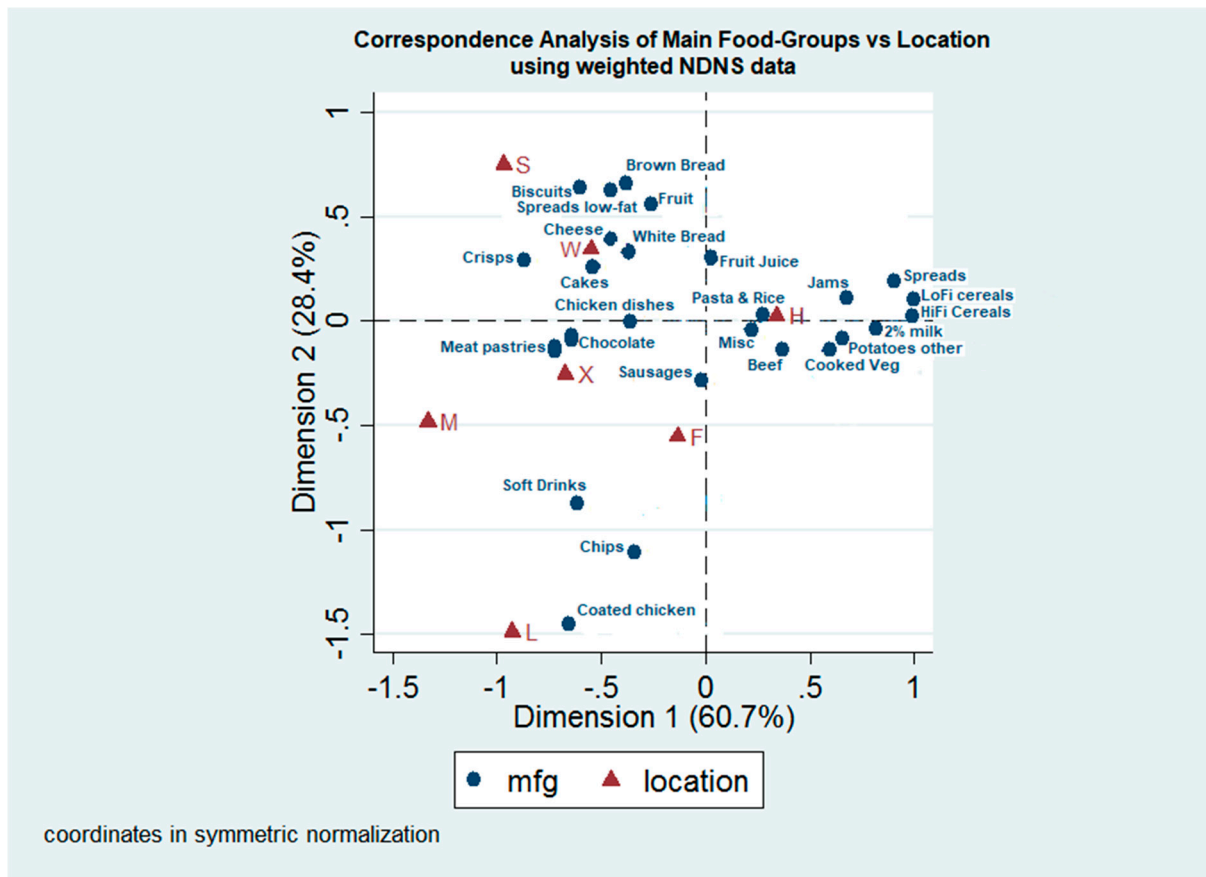

Supplement: nutrients-12-02235-s001.pdf [file nutrients-12-02235-s001.pdf]
